# Supplementary material for: Nociceptor neurons affect cancer immunosurveillance
Source: PubMed Central journal article supplement (PMC9646485; doi:10.1038/s41586-022-05374-w), 2022-11-02
Supplement: 41586_2022_5374_MOESM1_ESM.pdf [file 41586_2022_5374_MOESM1_ESM.pdf]

**Supplementary information**

---

**Nociceptor neurons affect cancer  
immunosurveillance**

---

In the format provided by the  
authors and unedited

| Specimen | Stage | Type                  | Location           | Breslow (mm)  | Ulceration |
|----------|-------|-----------------------|--------------------|---------------|------------|
| HN480    | pT4a  | Nodular               | R. temple          | 7 to 0.7      | No         |
| DERM 103 | pT1a  | Superficial spreading | L. post. shoulder  | 0.7           | No         |
| DERM 105 | pT2a  | Nevoid                | R. flank           | 1.1           | No         |
| DERM 106 | pT2a  | NOS                   | L. thigh           | 1.2           | No         |
| DERM 107 | pT2a  | NOS                   | L. upper outer arm | 1.6           | No         |
| DERM 110 | pT1b  | Nevoid                | L. lat. upper arm  | 0.81          | No         |
| DERM 112 | pT4b  | Nodular               | L. postaur. neck   | 11.3          | Yes        |
| DERM 113 | pT4b  | NOS                   | Vulva              | at least 19   | Yes        |
| DERM 114 | pT4a  | Nodular               | R. shoulder        | 16            | No         |
| DERM 115 | pT2a  | i.d. congenital nevus | L. back            | 2.8 and 0.8mm | No         |

| Specimen | Clark level | TILs                 | Mitotic Index (per mm <sup>2</sup> ) | Distant Mets |
|----------|-------------|----------------------|--------------------------------------|--------------|
| HN480    | IV          | "Present, nonbrisk"  | 10                                   | No           |
| DERM 103 | NC          | NC                   | "Low"                                | No           |
| DERM 105 | III         | "Slight to moderate" | "Low"                                | No           |
| DERM 106 | IV          | NC                   | "Low"                                | No           |
| DERM 107 | IV          | "Slight to moderate" | 3 ("High")                           | No           |
| DERM 110 | IV          | "Slight to moderate" | 2 ("High")                           | No           |
| DERM 112 | V           | "Present, nonbrisk"  | 11                                   | Liver        |
| DERM 113 | NC          | No                   | 5 ("High")                           | Liver        |
| DERM 114 | V           | "Slight to moderate" | 4 ("High")                           | Liver, lung  |
| DERM 115 | IV          | "Sparse"             | 1 "Low"                              | Brain        |

**Supplementary Table 1.** Board-certified pathologist notes on the specimens used in this study.

| Antibody                    | Company                    | Clone/cat number       | Dilution/concentration |
|-----------------------------|----------------------------|------------------------|------------------------|
| anti-AnnexinV-APC and 7-AAD | BioLegend                  | cat no: 640930         | 1:100                  |
| anti-CD11b-APC/Cy7          | BioLegend                  | cat no: 101226         | 1:100                  |
| anti-CD16/32                | BioLegend                  | cat no: 156604         | 1:100                  |
| anti-CD28                   | Bio X Cell                 | cat no: BE0015-5       | 1:4000                 |
| anti-CD3                    | Bio X Cell                 | cat no: BE0001-1       | 200µg/mouse            |
| anti-CD3                    | Bio X Cell                 | cat no: BE00011        | 1:3000                 |
| anti-CD45.1-BV421           | BioLegend                  | cat no: 110732         | 1:100                  |
| anti-CD45.2-BV650           | BioLegend                  | cat no: 109836         | 1:100                  |
| anti-CD45-Alexa Fluor 700   | BioLegend                  | cat no: 103128         | 1:100                  |
| anti-CD45-BV421             | BioLegend                  | cat no: 103134         | 1:100                  |
| anti-CD4-FITC               | BioLegend                  | cat no: 100406         | 1:100                  |
| anti-CD4-PerCP/Cyanine5.5   | BioLegend                  | cat no: 100540         | 1:100                  |
| anti-CD8                    | Bio X Cell                 | cat no: BP0061         | 200µg/mouse            |
| anti-CD8-AF700              | BioLegend                  | cat no: 100730         | 1:100                  |
| anti-CD8-BV421              | BioLegend                  | cat no: 100753         | 1:100                  |
| anti-CD8-Pacific Blue       | BioLegend                  | cat no: 100725         | 1:100                  |
| anti-CD8-PerCP/Cyanine5.5   | BioLegend                  | cat no: 100734         | 1:100                  |
| anti-GFP                    | Aves Labs                  | cat no: GFP-1020       | 1:500                  |
| anti-H-2Kb/OVA257-264       | NIH tetramer core facility | cat no: IEDB ID: 58560 | 1:100                  |
| anti-IFN-γ-APC              | BioLegend                  | cat no: 505810         | 1:100                  |
| anti-IFN-γ-FITC             | BioLegend                  | cat no: 505806         | 1:100                  |
| anti-IgG(H+L)-AF488         | Invitrogen                 | cat no: A28175         | 1:500                  |
| anti-IL-2-BV510             | BioLegend                  | cat no: 503833         | 1:100                  |
| anti-IL-2-Pacific Blue      | BioLegend                  | cat no: 503820         | 1:100                  |
| anti-IL2-Pecy7              | BioLegend                  | cat no: 503832         | 1:100                  |
| anti-IL4                    | Bio X Cell                 | cat no: BE0045         | 0.1:1000 - 1:1000      |
| anti-Lag3-PE                | BioLegend                  | cat no: 125208         | 1:100                  |
| anti-Lag3-PerCP/Cyanine5.5  | BioLegend                  | cat no: 125212         | 1:100                  |
| anti-mCherry                | OriGene                    | cat no: AB0040-200     | 1:500                  |
| anti-PD1-PE-Cy7             | BioLegend                  | cat no: 329917         | 1:100                  |
| anti-PDL1                   | Bio X Cell                 | cat no: BE0101         | 6mg/kg                 |
| anti-Tim3-APC               | BioLegend                  | cat no: 119706         | 1:100                  |
| anti-TNFα-BV510             | BioLegend                  | cat no: 506339         | 1:100                  |
| anti-TNFα-BV711             | BioLegend                  | cat no: 506349         | 1:100                  |
| anti-TNFα-PE                | BioLegend                  | cat no: 506306         | 1:100                  |
| anti-TRPV1                  | Alomone Labs               | cat no: ACC-030        | 1:100                  |
| DAPI                        | Vector Laboratories        | cat no: H-1000         | 1:2000                 |
| Viability Dye-eFluor780     | eBioscience                | cat no: 65-0865-14     | 1:1000                 |
| ZombieAqua                  | BioLegend                  | cat no: 423102         | 1:100                  |

**Supplementary Table 2.** A list of all the antibodies used for *in vitro* immune cell activation, *in vivo* cell depletion or neutralisation, flow cytometry, IHC or iDISCO experiments. The list details the clone/catalog number, commercial provider and dilution/concentration/dose used.
